# Supplementary material for: Hydrotrope induced structural modifications in CTAB/butanol/water/isooctane reverse micellar systems
Source: Royal Society of Chemistry journal article supplement (doi:10.1039/c7cp03191b), 2017-01-01
Supplement: c7cp03191b1.pdf [file c7cp03191b1.pdf]

## Supporting Information

### *Hydrotrope Induced Structural Modifications in CTAB/Butanol/Water/Isooctane*

#### *Reverse Micellar System*

Vaishali Sethi<sup>1</sup>, Jayanti Mishra<sup>1</sup>, Arpan Bhattacharaya<sup>2</sup>, Debasis Sen<sup>3</sup> and Ashok K. Ganguli\*<sup>1,4</sup>

1. Department of Chemistry, Indian Institute of Technology, Hauz Khas, New Delhi-110016, India.
2. Surface Physics and Material Science Division, Saha Institute of Nuclear Physics, Kolkata-700064, India.
3. Solid State Physics Division, Bhabha Atomic Research Centre, Mumbai 400085, India.
4. Institute of Nano Science & Technology, Habitat Centre, Phase- X, Sector – 64, Mohali, Punjab–160062, India.

#### **Contents**

1. Scheme 1
2. Volume fraction of micellar systems.
3. Structural parameters of hydrotrope- based CTAB reverse micellar system.
4. Parameters obtained from model fits of scattering data at different water loadings.
5. Schematic of structural transitions in hydrotrope-based reverse micellar system.
6. <sup>1</sup>H Chemical shift data for hydrotrope-based CTAB reverse micellar solutions at different  $W_x$  value
7. <sup>1</sup>HNMR spectrum of  $W_{16}$  and  $W_{20}$  reverse micellar system.
8. Experimental section.
9. Model Independent analysis of SAXS data.
10. References

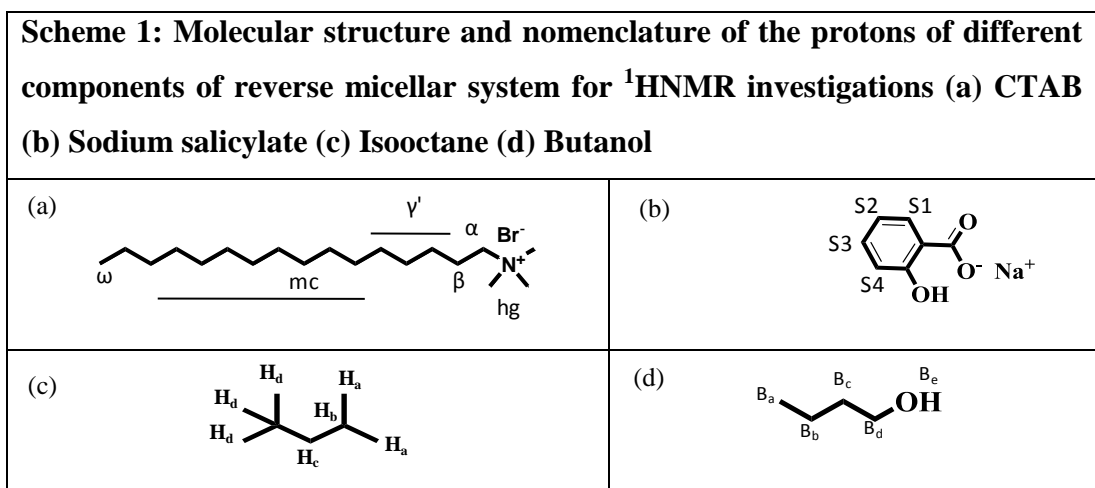

## 2. Volume fraction of micellar systems obtained from density- measurements

**TABLE S1: Density of hydrotrope-based reverse micellar solutions at different water loadings.**

|                  |                 | Density (in g/cm <sup>3</sup> ) |                 |                 |                 |
|------------------|-----------------|---------------------------------|-----------------|-----------------|-----------------|
| R                | W <sub>4</sub>  | W <sub>12</sub>                 | W <sub>16</sub> | W <sub>20</sub> | W <sub>30</sub> |
| R <sub>0</sub>   | 0.7601          | 0.7718                          | 0.7798          | 0.7830          | 0.7964          |
| R <sub>0.2</sub> | 0.7680          | 0.7791                          | 0.7859          | 0.7895          | 0.8013          |
| R <sub>0.4</sub> | System unstable | 0.7835                          | 0.7840          | 0.7947          | 0.8068          |
| R <sub>0.6</sub> | System unstable | 0.7895                          | 0.7959          | 0.8006          | 0.8120          |
| R <sub>0.8</sub> | System unstable | 0.7947                          | 0.8028          | 0.8049          | 0.8179          |
| R <sub>1</sub>   | System unstable | 0.7955                          | 0.8064          | 0.8105          | 0.8219          |

**TABLE S2: Volume fraction of hydrotrope-based reverse micellar solutions calculated from density measurement.**

| R                | W <sub>4</sub> | W <sub>12</sub> | W <sub>16</sub> | W <sub>20</sub> | W <sub>30</sub> |
|------------------|----------------|-----------------|-----------------|-----------------|-----------------|
| R <sub>0</sub>   | 0.1208         | 0.1794          | 0.2027          | 0.2349          | 0.3075          |
| R <sub>0.2</sub> | 0.1092         | 0.1687          | 0.1938          | 0.2254          | 0.2900          |
| R <sub>0.4</sub> | –              | 0.1624          | 0.1865          | 0.2179          | 0.2924          |
| R <sub>0.6</sub> | –              | 0.1537          | 0.1792          | 0.2093          | 0.2847          |
| R <sub>0.8</sub> | –              | 0.1460          | 0.1692          | 0.2030          | 0.2763          |
| R <sub>1</sub>   | –              | 0.1390          | 0.1639          | 0.1949          | 0.2704          |

**TABLE S3: Structural parameters of selected CTAB reverse micellar system obtained from complete fit of SAXS curve using cylindrical/ prolate ellipsoidal form factor and PRISM/Macroion as structure factor at different water loadings ( $W_x$ ).**

| $W_4$     |             |             |                      |            |            |                              |
|-----------|-------------|-------------|----------------------|------------|------------|------------------------------|
| R         | radius (nm) | length (nm) | $v_{mic}$ ( $nm^3$ ) | $N_{H_2O}$ | $N_{CTAB}$ | $N_{micelles}$ ( $10^{16}$ ) |
| $R_0$     | 1.09        | 32          | 119.38               | 3979       | 11937      | 5.38                         |
| $R_{0.2}$ | 1.03        | 48          | 186.55               | 6218       | 24872      | 2.59                         |

  

| R         | a (nm) | c (nm) | $R_w$ (nm) | $v_{mic}$ ( $nm^3$ ) | $N_{H_2O}$ | $N_{CTAB}$ | $N_{micelles}$ ( $10^{16}$ ) | $\alpha_f$ | $A_w$ ( $nm^2$ ) |
|-----------|--------|--------|------------|----------------------|------------|------------|------------------------------|------------|------------------|
| $W_{12}$  |        |        |            |                      |            |            |                              |            |                  |
| $R_0$     | 1.60   | 7.91   | 2.7        | 82                   | 2400       | 200        | 320                          | 0.0053     | 92               |
| $R_{0.2}$ | 1.65   | 14.02  | 3.3        | 150                  | 4392       | 366        | 170                          | 0.0048     | 137              |
| $R_{0.4}$ | 1.80   | 17.50  | 3.8        | 229                  | 6708       | 559        | 110                          | 0.0032     | 181              |
| $R_{0.6}$ | 1.74   | 19.02  | 4.0        | 267                  | 7836       | 653        | 100                          | 0.0026     | 201              |
| $R_1$     | 1.77   | 31.51  | 4.6        | 407                  | 11940      | 995        | 62                           | 0.0017     | 266              |
| $W_{16}$  |        |        |            |                      |            |            |                              |            |                  |
| $R_0$     | 1.95   | 9.07   | 3.4        | 145                  | 4384       | 274        | 230                          | 0.0040     | 145              |
| $R_{0.2}$ | 2.00   | 16.2   | 4.0        | 277                  | 8384       | 524        | 120                          | 0.0035     | 200              |
| $R_{0.4}$ | 2.00   | 20.03  | 4.3        | 338                  | 10224      | 639        | 100                          | 0.0033     | 232              |
| $R_{0.6}$ | 1.96   | 24.20  | 4.5        | 382                  | 11552      | 722        | 89                           | 0.0030     | 254              |
| $R_{0.8}$ | 1.95   | 29.31  | 4.8        | 466                  | 14096      | 881        | 73                           | 0.0025     | 289              |
| $R_1$     | 1.89   | 37.81  | 5.1        | 571                  | 17264      | 1079       | 62                           | 0.0016     | 326              |
| $W_{20}$  |        |        |            |                      |            |            |                              |            |                  |
| $R_0$     | 2.36   | 20.01  | 4.8        | 466                  | 14360      | 718        | 90                           | 0.0016     | 289              |
| $R_{0.2}$ | 2.56   | 23.61  | 5.3        | 647                  | 19940      | 997        | 63                           | 0.0015     | 352              |
| $R_{0.4}$ | 2.56   | 30.06  | 5.8        | 823                  | 25360      | 1268       | 51                           | 0.0013     | 422              |
| $R_{0.6}$ | 2.61   | 32.50  | 6.0        | 926                  | 28540      | 1427       | 45                           | 0.0013     | 452              |
| $R_{0.8}$ | 2.58   | 34.20  | 6.1        | 947                  | 29180      | 1459       | 44                           | 0.0012     | 467              |
| $R_1$     | 2.70   | 38.33  | 6.6        | 1194                 | 36800      | 1840       | 35                           | 0.0009     | 547              |
| $W_{30}$  |        |        |            |                      |            |            |                              |            |                  |
| $R_0$     | 3.20   | 16.60  | 5.5        | 749                  | 22470      | 790        | 86                           | 0.0026     | 379              |
| $R_{0.2}$ | 3.41   | 21.41  | 6.2        | 1090                 | 32700      | 1150       | 59                           | 0.0022     | 482              |
| $R_{0.4}$ | 3.40   | 23.83  | 6.5        | 1213                 | 36390      | 1278       | 53                           | 0.0020     | 530              |
| $R_{0.6}$ | 3.42   | 26.12  | 6.7        | 1331                 | 39930      | 1403       | 48                           | 0.0019     | 563              |
| $R_{0.8}$ | 3.40   | 28.51  | 6.9        | 1453                 | 43590      | 1532       | 44                           | 0.0017     | 597              |

**TABLE S4: Parameters obtained from model fits for W<sub>4</sub> CTAB reverse micellar system at different  $\pm$ hydrotrope concentration considering PRISM structure factor.**

|                  | FORM FACTOR<br>CYLINDRICAL |                | STRUCTURE FACTOR<br>PRISM |                |                            | $\chi^2$ |
|------------------|----------------------------|----------------|---------------------------|----------------|----------------------------|----------|
|                  | radius<br>(nm)             | length<br>(nm) | radius<br>(nm)            | length<br>(nm) | osmotic<br>compressibility |          |
| R <sub>0</sub>   | 1.09 $\pm$ 0.01            | 32 $\pm$ 1     | 1.08                      | 8              | 2.8                        | 1.87     |
| R <sub>0.2</sub> | 1.03 $\pm$ 0.01            | 48 $\pm$ 2     | 1.08                      | 8              | 3.2                        | 2.07     |

**TABLE S5: Parameters obtained from model fits for W<sub>12</sub> CTAB reverse micellar system at different hydrotrope concentration**

| R                | FORM FACTOR<br>ELLIPSOID II |       |            |              | STRUCTURE FACTOR<br>MACRO ION |            |       |        |        |          |
|------------------|-----------------------------|-------|------------|--------------|-------------------------------|------------|-------|--------|--------|----------|
|                  | a                           | c     | nu         | Eta          | Z                             | RHS        | ION   | $\eta$ | Vf     | $\chi^2$ |
| R <sub>0</sub>   | 1.60                        | 7.91  | 4.95       | 0.0209       | 0.455                         | 3.10       | 0.352 | 0.1794 | 0.1794 | 1.74     |
|                  | $\pm$ 0.01                  |       | $\pm$ 0.06 | $\pm$ 0.0001 | $\pm$ 0.001                   | $\pm$ 0.01 |       |        |        |          |
| R <sub>0.2</sub> | 1.65                        | 14.02 | 7.73       | 0.0187       | 2.019                         | 2.60       | 0.422 | 0.1687 | 0.1687 | 2.4      |
|                  | $\pm$ 0.02                  |       | $\pm$ 0.19 | $\pm$ 0.0002 | $\pm$ 0.001                   | $\pm$ 0.01 |       |        |        |          |
| R <sub>0.4</sub> | 1.80                        | 17.50 | 9.73       | 0.0145       | 2.036                         | 2.64       | 0.492 | 0.1623 | 0.1623 | 3.1      |
|                  | $\pm$ 0.01                  |       | $\pm$ 0.12 | $\pm$ 0.0005 | $\pm$ 0.008                   | $\pm$ 0.02 |       |        |        |          |
| R <sub>0.6</sub> | 1.74                        | 19.02 | 11.12      | 0.0140       | 1.918                         | 2.72       | 0.563 | 0.1536 | 0.1536 | 4.9      |
|                  | $\pm$ 0.02                  |       | $\pm$ 0.65 | $\pm$ 0.0004 | $\pm$ 0.009                   | $\pm$ 0.03 |       |        |        |          |
| R <sub>1</sub>   | 1.77                        | 31.15 | 17.81      | 0.0116       | 1.932                         | 2.51       | 0.724 | 0.1390 | 0.1390 | 3.9      |
|                  | $\pm$ 0.03                  |       | $\pm$ 0.30 | $\pm$ 0.0001 | $\pm$ 0.008                   | $\pm$ 0.02 |       |        |        |          |

a = minor axis of ellipsoid (nm)

c = major axis of ellipsoid (nm)

Eta = scattering constant

ION= Ionic strength

V<sub>f</sub> = Volume fraction obtained from density measurement

$\chi^2$  = Reduced chi-square

nu = c/a

Z = charge on reverse micellar system

RHS = Radius of Hard sphere interaction (in nm)

$\eta$  = Volume fraction obtained from fit

**TABLE S6: Parameters obtained from model fits for  $W_{16}$  CTAB reverse micellar system at different hydrotrope concentration**

| R         | FORM FACTOR  |       |            |              | STRUCTURE FACTOR |            |       |        |        |          |
|-----------|--------------|-------|------------|--------------|------------------|------------|-------|--------|--------|----------|
|           | ELLIPSOID II |       |            |              | MACRO ION        |            |       |        |        |          |
|           | a            | c     | nu         | Eta          | Z                | RHS        | ION   | $\eta$ | Vf     | $\chi^2$ |
| $R_0$     | 1.95         | 9.07  | 4.65       | 0.0155       | 1.213            | 3.74       | 0.352 | 0.2027 | 0.2027 | 3.2      |
|           | $\pm 0.04$   |       | $\pm 0.27$ | $\pm 0.0004$ | $\pm 0.014$      | $\pm 0.01$ |       |        |        |          |
| $R_{0.2}$ | 2.00         | 16.2  | 8.05       | 0.0117       | 1.914            | 3.49       | 0.422 | 0.1938 | 0.1938 | 2.3      |
|           | $\pm 0.03$   |       | $\pm 0.36$ | $\pm 0.0002$ | $\pm 0.016$      | $\pm 0.07$ |       |        |        |          |
| $R_{0.4}$ | 2.02         | 20.03 | 10.23      | 0.0115       | 2.323            | 3.06       | 0.492 | 0.1879 | 0.1879 | 3.0      |
|           | $\pm 0.04$   |       | $\pm 0.25$ | $\pm 0.0002$ | $\pm 0.011$      | $\pm 0.06$ |       |        |        |          |
| $R_{0.6}$ | 1.95         | 24.20 | 12.24      | 0.0118       | 2.397            | 3.04       | 0.563 | 0.1792 | 0.1792 | 4.7      |
|           | $\pm 0.05$   |       | $\pm 0.55$ | $\pm 0.0003$ | $\pm 0.009$      | $\pm 0.05$ |       |        |        |          |
| $R_{0.8}$ | 1.95         | 29.31 | 15.01      | 0.0111       | 2.44             | 2.87       | 0.634 | 0.1692 | 0.1692 | 3.9      |
|           | $\pm 0.03$   |       | $\pm 0.23$ | $\pm 0.0003$ | $\pm 0.007$      | $\pm 0.05$ |       |        |        |          |
| $R_1$     | 1.89         | 37.81 | 20.02      | 0.0104       | 2.011            | 2.92       | 0.704 | 0.1639 | 0.1639 | 5.5      |
|           | $\pm 0.02$   |       | $\pm 0.20$ | $\pm 0.0002$ | $\pm 0.009$      | $\pm 0.06$ |       |        |        |          |

**TABLE S7: Parameters obtained from model fits for  $W_{20}$  CTAB reverse micellar system at different hydrotrope concentration**

| R         | FORM FACTOR  |       |            |              | STRUCTURE FACTOR |            |       |             |        |          |
|-----------|--------------|-------|------------|--------------|------------------|------------|-------|-------------|--------|----------|
|           | ELLIPSOID II |       |            |              | MACRO ION        |            |       |             |        |          |
|           | a            | c     | nu         | Eta          | Z                | RHS        | ION   | $\eta$      | Vf     | $\chi^2$ |
| $R_0$     | 2.38         | 20.01 | 8.40       | 0.0088       | 1.210            | 3.78       | 0.292 | 0.1671      | 0.2349 | 1.8      |
|           | $\pm 0.08$   |       | $\pm 0.21$ | $\pm 0.0007$ | $\pm 0.014$      | $\pm 0.02$ |       | $\pm 0.005$ |        |          |
| $R_{0.2}$ | 2.59         | 23.61 | 9.1        | 0.0069       | 2.172            | 4.47       | 0.404 | 0.2048      | 0.2254 | 1.7      |
|           | $\pm 0.01$   |       | $\pm 0.15$ | $\pm 0.0006$ | $\pm 0.024$      | $\pm 0.01$ |       | $\pm 0.004$ |        |          |
| $R_{0.4}$ | 2.58         | 30.06 | 11.62      | 0.0072       | 1.925            | 4.06       | 0.454 | 0.2069      | 0.2179 | 1.5      |
|           | $\pm 0.02$   |       | $\pm 0.43$ | $\pm 0.001$  | $\pm 0.026$      | $\pm 0.01$ |       | $\pm 0.005$ |        |          |
| $R_{0.6}$ | 2.68         | 32.50 | 12.10      | 0.0062       | 2.414            | 3.83       | 0.523 | 0.1923      | 0.2093 | 1.9      |
|           | $\pm 0.03$   |       | $\pm 0.11$ | $\pm 0.0004$ | $\pm 0.011$      | $\pm 0.05$ |       | $\pm 0.003$ |        |          |
| $R_{0.8}$ | 2.56         | 34.20 | 13.32      | 0.0070       | 1.871            | 3.66       | 0.582 | 0.1908      | 0.2030 | 1.9      |
|           | $\pm 0.02$   |       | $\pm 0.61$ | $\pm 0.0001$ | $\pm 0.009$      | $\pm 0.04$ |       | $\pm 0.006$ |        |          |
| $R_1$     | 2.73         | 38.33 | 14.01      | 0.0058       | 1.9140           | 3.65       | 0.600 | 0.1848      | 0.1949 | 2.3      |
|           | $\pm 0.04$   |       | $\pm 0.41$ | $\pm 0.0002$ | $\pm 0.023$      | $\pm 0.06$ |       | $\pm 0.004$ |        |          |

**TABLE S8: Parameters obtained from model fits for  $W_{30}$  CTAB reverse micellar system at different hydrotrope concentration**

| R         | FORM FACTOR  |       |            |              |             | STRUCTURE FACTOR |       |             |        |          |
|-----------|--------------|-------|------------|--------------|-------------|------------------|-------|-------------|--------|----------|
|           | ELLIPSOID II |       |            |              |             | MACRO ION        |       |             |        |          |
|           | a            | c     | nu         | Eta          | Z           | RHS              | ION   | $\eta$      | Vf     | $\chi^2$ |
| $R_0$     | 3.14         | 16.60 | 5.28       | 0.0061       | 2.045       | 4.92             | 0.296 | 0.1852      | 0.3075 | 1.5      |
|           | $\pm 0.09$   |       | $\pm 0.21$ | $\pm 0.0004$ | $\pm 0.097$ | $\pm 0.03$       |       | $\pm 0.004$ |        |          |
| $R_{0.2}$ | 3.41         | 21.41 | 6.31       | 0.0055       | 2.585       | 5.19             | 0.173 | 0.2240      | 0.2973 | 1.5      |
|           | $\pm 0.06$   |       | $\pm 0.11$ | $\pm 0.0003$ | $\pm 0.018$ | $\pm 0.02$       |       | $\pm 0.003$ |        |          |
| $R_{0.4}$ | 3.42         | 23.83 | 7.01       | 0.0054       | 2.593       | 5.08             | 0.513 | 0.2289      | 0.2924 | 1.4      |
|           | $\pm 0.09$   |       | $\pm 0.18$ | $\pm 0.0003$ | $\pm 0.204$ | $\pm 0.03$       |       | $\pm 0.006$ |        |          |
| $R_{0.6}$ | 3.42         | 26.12 | 7.61       | 0.0052       | 2.750       | 5.08             | 0.546 | 0.2281      | 0.2846 | 1.5      |
|           | $\pm 0.05$   |       | $\pm 0.16$ | $\pm 0.0002$ | $\pm 0.145$ | $\pm 0.02$       |       | $\pm 0.002$ |        |          |
| $R_{0.8}$ | 3.40         | 28.51 | 8.42       | 0.0056       | 2.624       | 5.09             | 0.645 | 0.2278      | 0.2762 | 1.2      |
|           | $\pm 0.01$   |       | $\pm 0.19$ | $\pm 0.0004$ | $\pm 0.181$ | $\pm 0.09$       |       | $\pm 0.005$ |        |          |

**TABLE S9: Scattering length densities of different components of reverse micelle.**

|                                       | X-ray( $10^{-6}/\text{\AA}^2$ ) |
|---------------------------------------|---------------------------------|
| Isooctane                             | 6.80                            |
| H <sub>2</sub> O                      | 9.47                            |
| C <sub>19</sub> H <sub>42</sub> N     | 6.82                            |
| OHC <sub>6</sub> H <sub>4</sub> COONa | 3.93                            |
| Butanol                               | 7.81                            |
| Br <sup>-</sup>                       | 26.61                           |

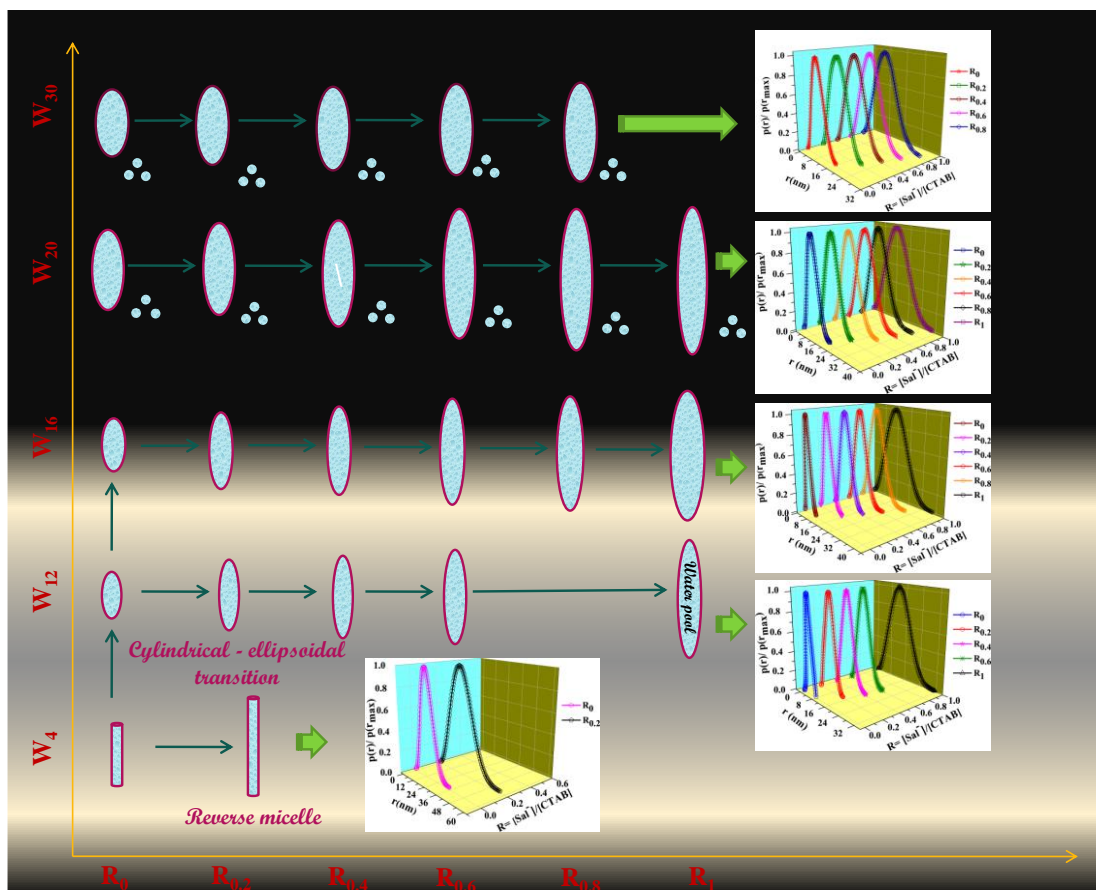

Figure S1: Schematic representation of cylindrical to ellipsoidal transition and hydrotrope induced micellar growth in CTAB microemulsion system at different water loadings.



**Table S10.  $^1\text{H}$  Chemical shift data for hydrotrope-based CTAB reverse micellar solutions at different  $W_x$  value**

| Solutions          | $\alpha$ | hg   | $\beta$ | $\gamma'$ | mc'      | $\Omega$                   | S1          | S3          | S2/<br>S4   | $\alpha$ -<br>but | $B_w$ | $I_w$ |
|--------------------|----------|------|---------|-----------|----------|----------------------------|-------------|-------------|-------------|-------------------|-------|-------|
| 100mm<br>CTAB      | 3.62     | 3.48 | 1.76    | 1.37      | 1.2<br>6 | 0.88                       |             |             |             |                   |       |       |
| NaSal<br>in $D_2O$ |          |      |         |           |          |                            | 8.24<br>(d) | 7.49<br>(t) | 6.82<br>(q) |                   |       |       |
|                    |          |      |         |           |          | <b><math>W_4</math></b>    |             |             |             |                   |       |       |
| $R_0$              | 3.78     | 3.57 | 2.05    |           |          | 1.05                       |             |             |             | 3.85              | 4.64  | 5.06  |
| $R_{0.2}$          | 3.70     | 3.54 | 2.01    |           |          | 1.04                       | 8.14        | 7.46        | 7.05        | 3.83              | 4.74  | D     |
|                    |          |      |         |           |          | <b><math>W_{12}</math></b> |             |             |             |                   |       |       |
| $R_0$              | 3.70     | 3.49 | 2.08    |           |          | 1.03                       |             |             |             | 3.84              | 4.83  | 5.16  |
| $R_{0.2}$          | 3.63     | 3.46 | 2.01    |           |          | 1.02                       | 8.15        | 7.44        | 7.03        | 3.82              | 4.82  | 5.11  |
| $R_{0.4}$          | 3.55     | 3.42 |         |           |          | 1.01                       | 8.13        | 7.43        | 7.02        | 3.80              | 4.82  | D     |
| $R_{0.6}$          | 3.46     | 3.38 |         |           |          | 1.00                       | 8.11        | 7.41        | 7.00        | 3.78              | 4.82  | D     |
| $R_{0.8}$          | 3.38     | 3.33 |         |           |          | 1.00                       | 8.09        | 7.39        | 6.98        | 3.76              | 4.81  | D     |
| $R_1$              | 3.32     | 3.29 |         |           |          | 0.99                       | 8.07        | 7.37        | 6.96        | 3.74              | 4.81  | D     |
|                    |          |      |         |           |          | <b><math>W_{16}</math></b> |             |             |             |                   |       |       |
| $R_0$              | 3.70     | 3.48 | 2.0     |           |          | 1.02                       |             |             |             | 3.84              | 4.88  | 5.15  |
| $R_{0.2}$          | 3.61     | 3.44 | 2.00    |           |          | 1.00                       | 8.13        | 7.43        | 7.02        | 3.81              | 4.86  | 5.11  |
| $R_{0.4}$          | 3.53     | 3.40 |         |           |          | 0.99                       | 8.11        | 7.42        | 7.00        | 3.78              | 4.86  | D     |
| $R_{0.6}$          | 3.44     | 3.36 |         |           |          | 0.99                       | 8.09        | 7.40        | 6.99        | 3.77              | 4.84  | D     |
| $R_{0.8}$          | 3.36     | 3.31 |         |           |          | 0.99                       | 8.07        | 7.38        | 6.97        | 3.75              | 4.84  | D     |
| $R_1$              | 3.31     | 3.27 |         |           |          | 0.98                       | 8.06        | 7.36        | 6.96        | 3.74              | 4.82  | D     |
|                    |          |      |         |           |          | <b><math>W_{20}</math></b> |             |             |             |                   |       |       |
| $R_0$              | 3.64     | 3.42 | 2.04    |           |          | 0.97                       |             |             |             | 3.79              | 4.90  | 5.17  |
| $R_{0.2}$          | 3.60     | 3.42 | 2.00    |           |          | 0.99                       | 8.13        | 7.43        | 7.02        | 3.80              | 4.88  | 5.13  |
| $R_{0.4}$          | 3.51     | 3.39 |         |           |          | 0.99                       | 8.11        | 7.42        | 7.00        | 3.78              | 4.87  | D     |
| $R_{0.6}$          | 3.43     | 3.34 |         |           |          | 0.99                       | 8.08        | 7.40        | 6.98        | 3.75              | 4.86  | D     |
| $R_{0.8}$          | 3.35     | 3.30 |         |           |          | 0.98                       | 8.07        | 7.38        | 6.96        | 3.74              | 4.85  | D     |
| $R_1$              | 3.29     | 3.25 |         |           |          | 0.97                       | 8.04        | 7.38        | 6.94        | 3.72              | 4.83  | D     |
|                    |          |      |         |           |          | <b><math>W_{30}</math></b> |             |             |             |                   |       |       |
| $R_0$              | 3.65     | 3.41 | 2.10    |           |          |                            |             |             |             | 3.80              | 4.93  | 5.18  |
| $R_{0.2}$          | 3.55     | 3.40 | 1.98    |           |          |                            | 8.09        | 7.40        | 6.98        | 3.77              | 4.91  | 5.15  |
| $R_{0.4}$          | 3.47     | 3.39 |         |           |          |                            | 8.07        | 7.38        | 6.97        | 3.75              | 4.90  | 5.13  |
| $R_{0.6}$          | 3.45     | 3.39 |         |           |          |                            | 8.07        | 7.39        | 6.97        | 3.75              | 4.89  | 5.12  |
| $R_{0.8}$          | 3.40     | 3.38 |         |           |          |                            | 8.06        | 7.38        | 6.97        | 3.75              | 4.89  | 5.09  |

**D= Peak Disappeared**

**Table S11. Comparative trends of  $V_{Na^+}$  and  $V_{mic}$  for  $W_{12}$  and  $W_{30}$  system at different R values**

| <b><math>W_{12}</math></b> |                                                                                                                |                                                                                  |                                                                                                                             |                                                          |
|----------------------------|----------------------------------------------------------------------------------------------------------------|----------------------------------------------------------------------------------|-----------------------------------------------------------------------------------------------------------------------------|----------------------------------------------------------|
| <b>R value</b>             | <b>Number density of <math>Na^+</math> ions at different salicylate concentration <math>[ND_{Na^+}]</math></b> | <b>Number of sodium ions per micelle <math>N_{Na^+} = [ND_{Na^+}/N_m]</math></b> | <b>Total Volume of <math>Na^+</math> ions per micelle <math>V_{Na^+} = [v_{Na^+} * N_{Na^+}]</math> (<math>nm^3</math>)</b> | <b>Volume of ellipsoidal micelle (<math>nm^3</math>)</b> |
| $R_{0.2}$                  | $1.28 * 10^{20}$                                                                                               | 75                                                                               | 0.68                                                                                                                        | 150                                                      |
| $R_{0.4}$                  | $2.6 * 10^{20}$                                                                                                | 236                                                                              | 2.12                                                                                                                        | 229                                                      |
| $R_{0.6}$                  | $3.9 * 10^{20}$                                                                                                | 390                                                                              | 3.51                                                                                                                        | 267                                                      |
| $R_1$                      | $6.5 * 10^{20}$                                                                                                | 1083                                                                             | 9.75                                                                                                                        | 407                                                      |
| <b><math>W_{30}</math></b> |                                                                                                                |                                                                                  |                                                                                                                             |                                                          |
| $R_{0.2}$                  | $1.28 * 10^{20}$                                                                                               | 148                                                                              | 1.33                                                                                                                        | 1035                                                     |
| $R_{0.4}$                  | $2.6 * 10^{20}$                                                                                                | 509                                                                              | 4.58                                                                                                                        | 1151                                                     |
| $R_{0.6}$                  | $3.9 * 10^{20}$                                                                                                | 736                                                                              | 6.62                                                                                                                        | 1263                                                     |
| $R_{0.8}$                  | $5.2 * 10^{20}$                                                                                                | 1181                                                                             | 10.63                                                                                                                       | 1379                                                     |

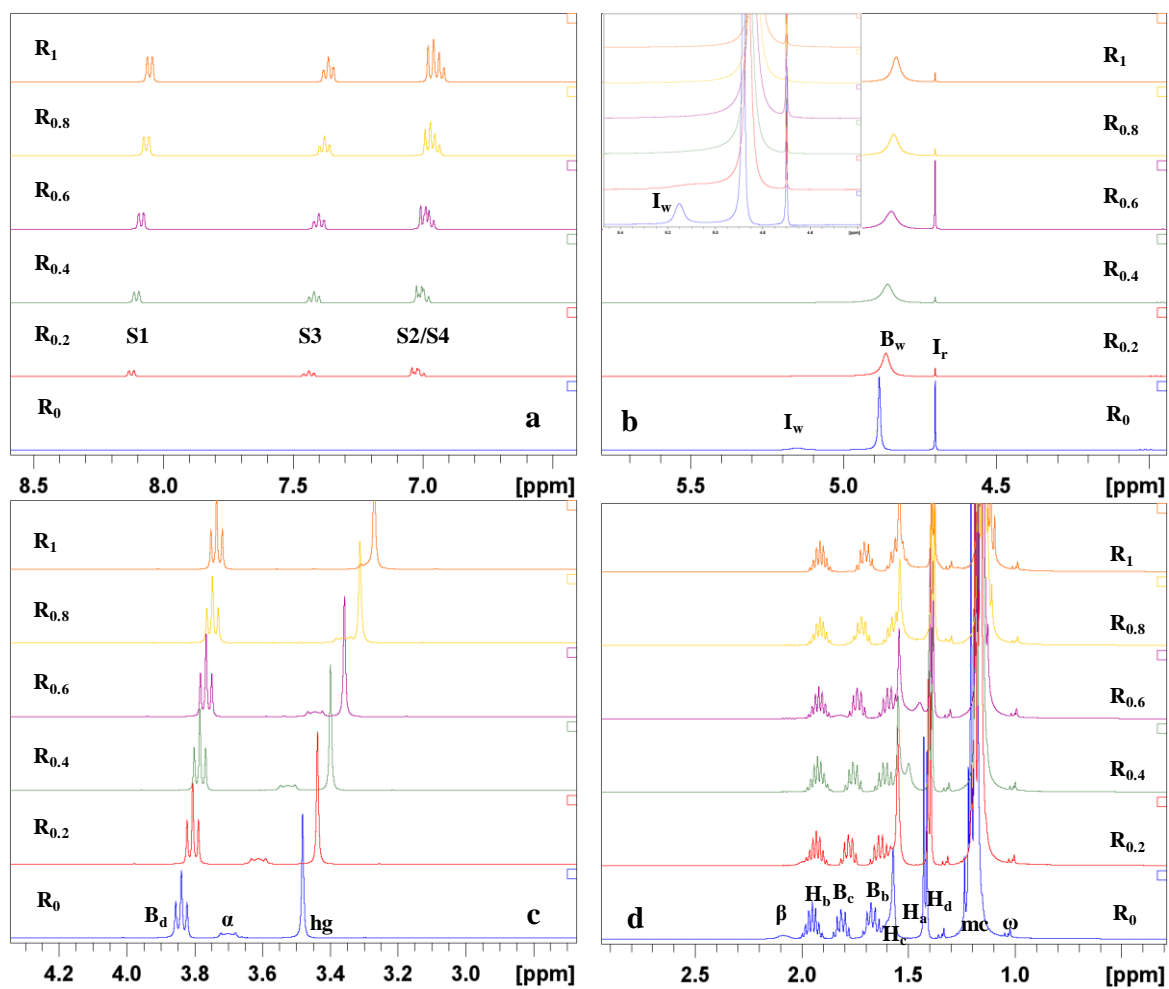

Figure S2. Different regions of  $^1\text{H}$ NMR spectrum of  $\text{W}_{16}$  reverse micellar systems at different  $R$  values (a) aromatic salicylate protons (b) interfacial and bulk water proton resonance peak (c) resonance of  $B_d$  and  $\alpha$ , hg protons of co-surfactant and surfactant respectively (d) Protons corresponding to hydrophobic tails of surfactant, co-surfactant and organic isooctane layer.

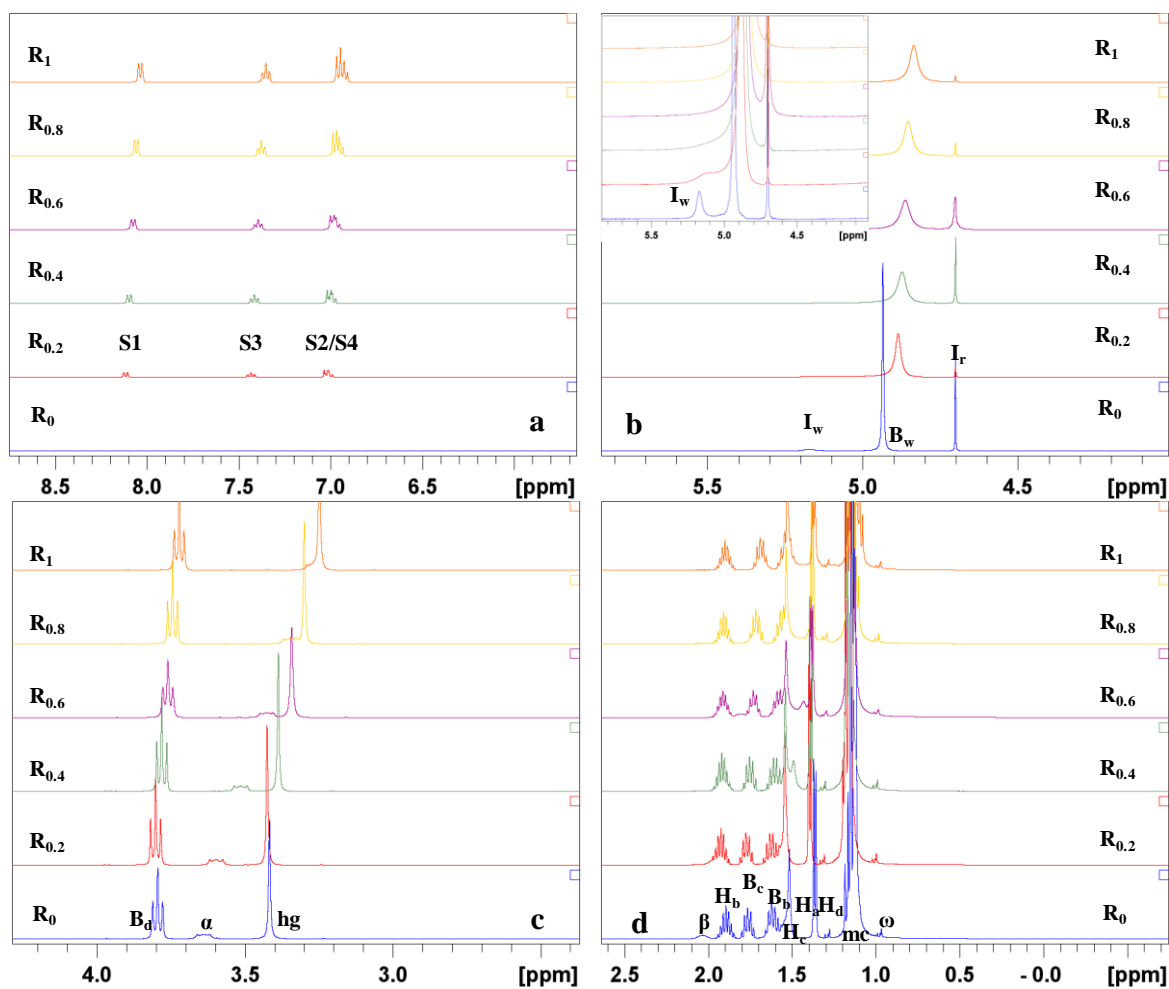

Figure S3. Different regions of  $^1\text{H}$ NMR spectrum of  $\text{W}_{20}$  reverse micellar systems at different R values (a) aromatic salicylate protons (b) interfacial and bulk water proton resonance peak (c) resonance of  $\text{B}_d$  and  $\alpha$ , hg protons of co-surfactant and surfactant respectively (d) Protons corresponding to hydrophobic tails of surfactant, co-surfactant and organic isooctane layer.

## Density Measurement

The densities of the organic solvent isooctane ( $\rho_{oil}$ ) and of reverse micellar solutions ( $\rho_s$ ) at different salt concentration were determined at  $25.00 \pm 0.01^\circ\text{C}$  using DE45 Mettler Toledo density meter. For each solution the density measurement were performed atleast 3 times and averaged. The precision obtained is of the order of  $\pm 2*10^{-4} \text{ g/cm}^3$ .

**Small - Angle X-ray Scattering Measurement:** SAXS measurements were conducted at the Indian Beamline at 2.5GeV second generation synchrotron at Photon Factory, KEK, Japan, with a custom designed SAXS setup. The geometry used for the experiment was transmission mode SAXS, sample was kept in a custom made glass capillary (1.5 mm diameter) on a custom made holder and was illuminated using a monochromatic X-Ray of energy 10KeV with a sample to detector distance of 3902mm. The beam dimension used was 0.4 mm vertically and 1mm horizontally. The 2-D scattering pattern was recorded by 1M PILATUS detector with a pixel resolution of  $172\mu\text{m} \times 172\mu\text{m}$  with total number of pixels to be  $981 \times 1043$  for Vertical X Horizontal geometry. The 2D raw data was linearly averaged with GIXSGUI programme<sup>1</sup> written on MATLAB and obtained as one - dimensional scattering intensities,  $I(q)$ , as a function of the scattering vector [ $q = 4\pi/\lambda \sin \theta/2$ ] where  $\theta$  corresponds to scattering angle. For our experiments the maximum and minimum dimensions probed by scattered rays are 57nm & 3.5 nm respectively (corresponding to  $q$ -range of 0.13 to  $1.78 \text{ nm}^{-1}$ ). The 1D scattering intensity distribution,  $I(q)$ , were corrected for background and capillary effect contributions and represented in arbitrary unit.<sup>2</sup> All scattering curves were analyzed by the Indirect Fourier transformation using the program ScÅtter to calculate PDDF and also fitted with standard scattering models using SASFIT.<sup>3</sup>

## Proton Nuclear Magnetic Resonance ( $^1\text{H}$ NMR)

The  $^1\text{H}$  NMR spectra of reverse micellar system corresponding to 6 different R value ( $R_0$ - $R_1$ ) for each targeted  $W_x$  value had been recorded with the help of Bruker Avon 400 MHz spectrometer (at Indian Institute of Technology Delhi) at  $25^\circ \text{C}$ . The chemical shift of  $^1\text{H}$  protons are represented in ppm and calibrated with an external standard. The external standard used was a reference capillary filled with  $\text{D}_2\text{O}$  having chemical shift of  $\delta = 4.7 \text{ ppm}$  and added in the NMR

tube of each microemulsion system prior to the measurement. Number of scans for all  $^1\text{H}$  NMR measurements were kept constant i.e. 48.

### Model Independent analysis of SAXS data

The SAXS scattering curves were also evaluated by Indirect Fourier transformation<sup>4</sup> (IFT) using ScÅtter software which works on modifications of Moore function<sup>5</sup> to convert the scattering data into real space and to determine the pair-distance distribution function,  $p(r)$ . The shape and maximum dimension of the particle,  $r_{\text{max}}$  (abscissa value where  $p(r)$  reaches zero) are the two important parameters which can be estimated from  $p(r)$  curves.

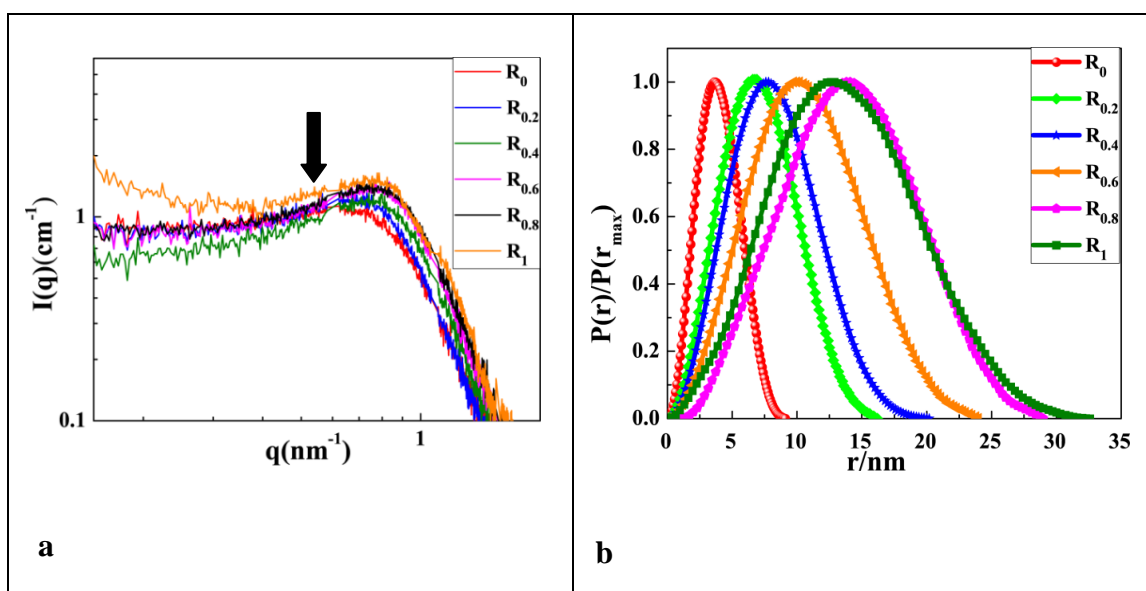

**Figure S4.** (a) Scattering profile for  $W_{16}$  (b) Corresponding normalized pair density distribution function  $p(r)/p(r_{\text{max}})$  as a function of maximum dimension of ellipsoid  $r(\text{nm})$

The IFT transformation is performed on the scattering profile after trimming the intensity points upto the  $q$ -value corresponding to the highest intensity of each scattering curve (represented by arrow in Figure S4 (a)) below which the intensity decreases abruptly due to extensive intermicellar interaction) and by increasing the  $r_{\text{max}}$  (nm) value to obtain the positive  $p(r)$  distribution. The  $r_{\text{max}}$  (representing the major axis of the ellipsoid) and shape of the particle obtained from  $p(r)$  curves are in good agreement with that obtained from model fits for all the  $W_x$  value studied. Figure S4 (a) & (b) represents the scattering profile and normalized pair distance distribution function  $p(r)$  for systems with water loadings  $W_{16}$ . Details regarding the  $p(r)$  functions of the other reverse micellar systems studied at different  $W_x$  value are given in the

main manuscript, however the similar procedure (as described above ) is followed for calculation of  $p(r)$  function for other systems also.

**References:**

- 1Z. Jiang, *J. Appl. Crystallogr.*, 2015, **48**, 917–926.
- 2T. Zemb, O. Tache, F. Né and O. Spalla, *J. Appl. Crystallogr.*, 2003, **36**, 800–805.
- 3I. Breßler, J. Kohlbrecher and A. F. Thünemann, *J. Appl. Crystallogr.*, 2015, **48**, 1587–1598.
- 4O. Glatter, *J. Appl. Crystallogr.*, 1979, **12**, 166–175.
- 5P. B. Moore, *J. Appl. Crystallogr.*, 1980, **13**, 168–175.
